# Supplementary material
Source: Springer Nature journal article supplement (https://www.springermedizin.de/resource/supplementary/12914_2005_25_MOESM1_ESM.pdf/9537358)

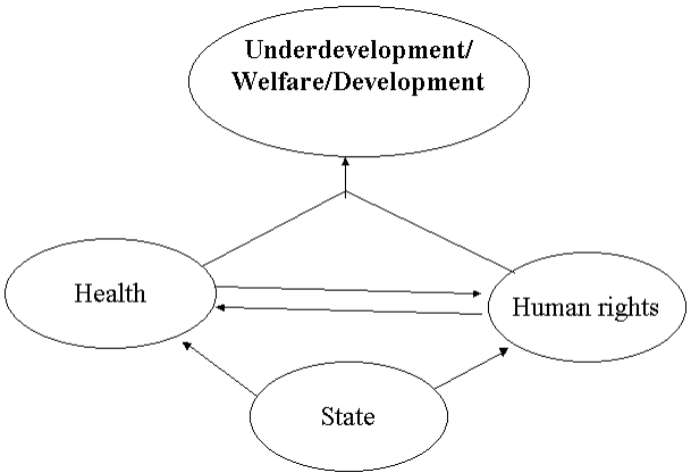

Supplement: MOESM1 [file 9537358]
